# Supplementary material
Source: PubMed Central journal article supplement (PMC2453739)
Supplement: 0804042105_0804042105SI.pdf [file 0804042105_0804042105SI.pdf]

# Supporting Information

Hansen *et al.* 10.1073/pnas.0804042105

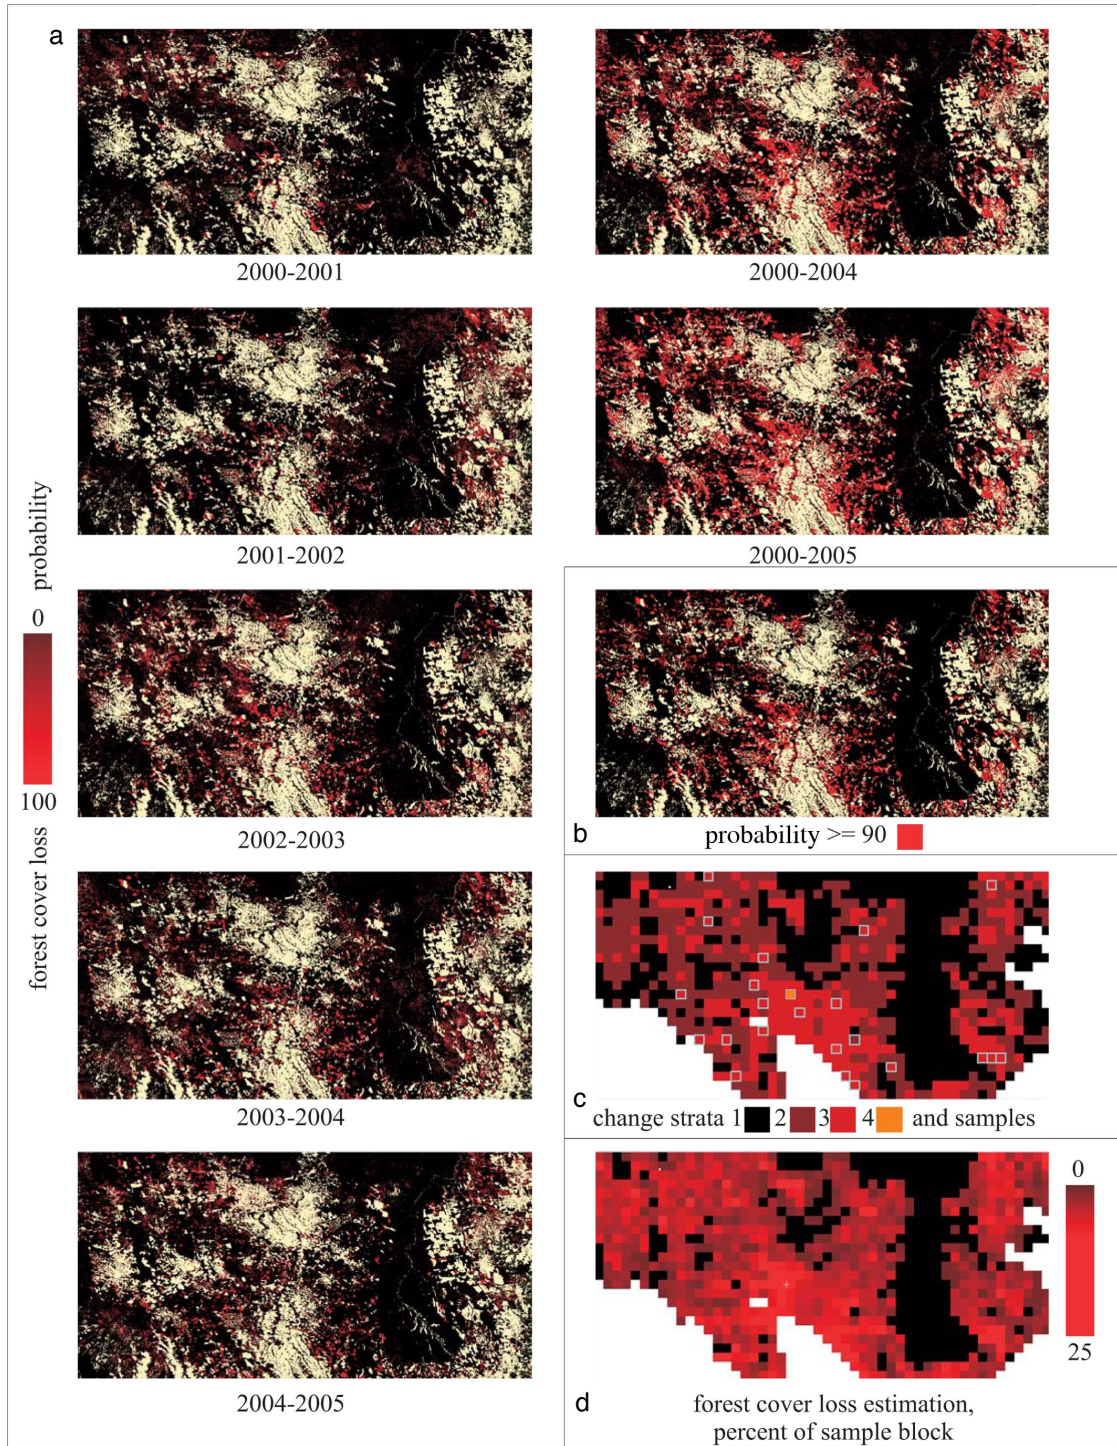

**Fig. S1.** Maps of MODIS forest cover loss probability per study interval (a), thresholded forest cover loss at 90% probability (occurring within any of the study intervals) (b), sampling strata (0–2%, 3–9%, >9%, and certainty strata with selected samples outlined in cyan) (c), and final change area estimate based on regression estimation procedure (d). The images are centered on 55.09°W, 12.06°S in Mato Grosso state, Brazil, and is 926.6 km × 463.3 km in size. For a and b, white is areas outside of the humid tropical forest biome, black is forest, and beige is nonforest as defined by a 25% Vegetation Continuous Field tree cover threshold.

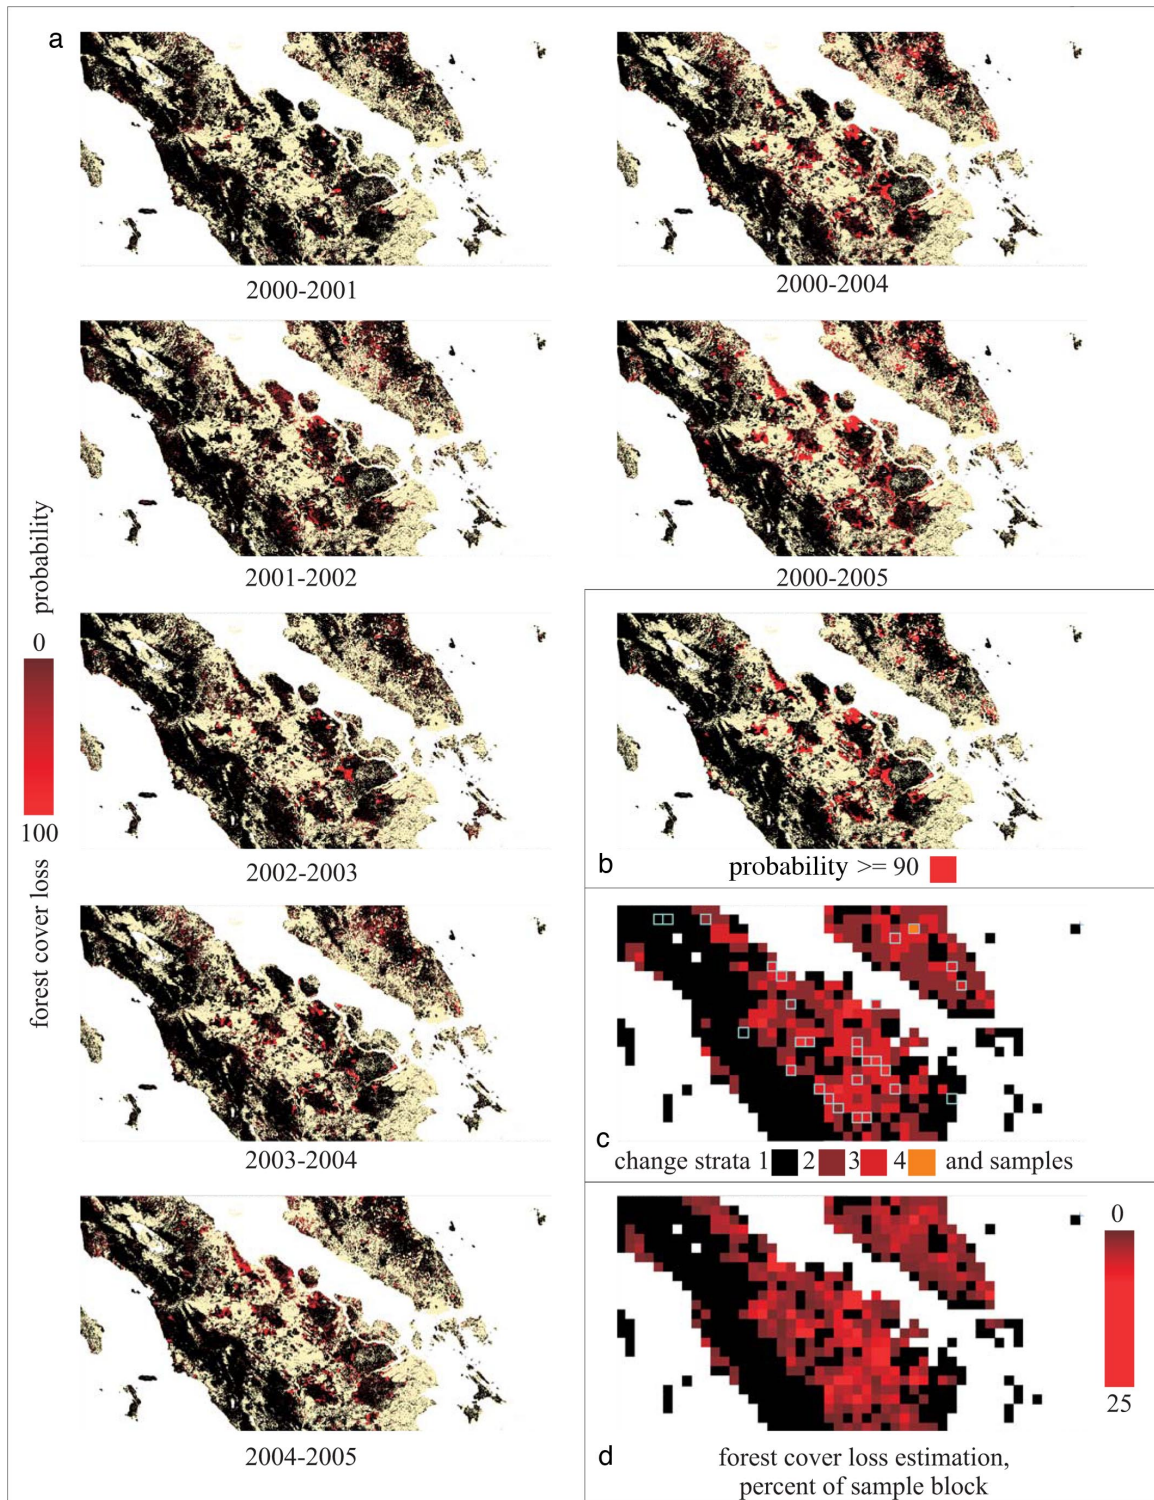

**Fig. S2.** Maps of MODIS forest cover loss probability per study interval (a), thresholded forest cover loss at 90% probability (occurring within any of the study intervals) (b), sampling strata (0–2%, 3–9%, >9%, and certainty strata with selected samples outlined in cyan) (c), and final change area estimate based on regression estimation procedure (d). The images are centered on 101.69°E, 1.25°N in Riau province, Indonesia, and is 926.6 km × 463.3 km in size. For a and b, white is areas outside of the humid tropical forest biome, black is forest, and beige is nonforest as defined by a 25% Vegetation Continuous Field tree cover threshold.

**Table S1. Effect of missing data due to cloud cover and SLC-off gaps on the final sample of blocks used for the Landsat-derived observation of forest cover and forest loss**

| Stratum/region             | No. of sample blocks classified | No. of sample blocks excluded | Distribution of percent useable data (% area unaffected by clouds, SLC-off gaps) |        |                |
|----------------------------|---------------------------------|-------------------------------|----------------------------------------------------------------------------------|--------|----------------|
|                            |                                 |                               | First quartile                                                                   | Median | Third quartile |
| 1                          | 87                              | 17                            | 55                                                                               | 73     | 84             |
| 2                          | 40                              | 3                             | 56                                                                               | 73     | 86             |
| 3                          | 50                              | 6                             | 65                                                                               | 80     | 89             |
| 4                          | 6                               | 0                             | 66                                                                               | 79     | 84             |
| Africa                     | 12                              | 0                             | 56                                                                               | 67     | 81             |
| Asia*                      | 31                              | 2                             | 49                                                                               | 69     | 82             |
| Indonesia                  | 77                              | 21                            | 56                                                                               | 71     | 82             |
| South America <sup>†</sup> | 63                              | 3                             | 68                                                                               | 83     | 90             |

\*Excluding Indonesia.

<sup>†</sup>Including one sample block in North America.
